# Supplementary material
Source: publisher figshare collection journal article supplement (https://frontiersin.figshare.com/ndownloader/files/24203873)
Supplement: Supplementary file 1 [file 24203873]

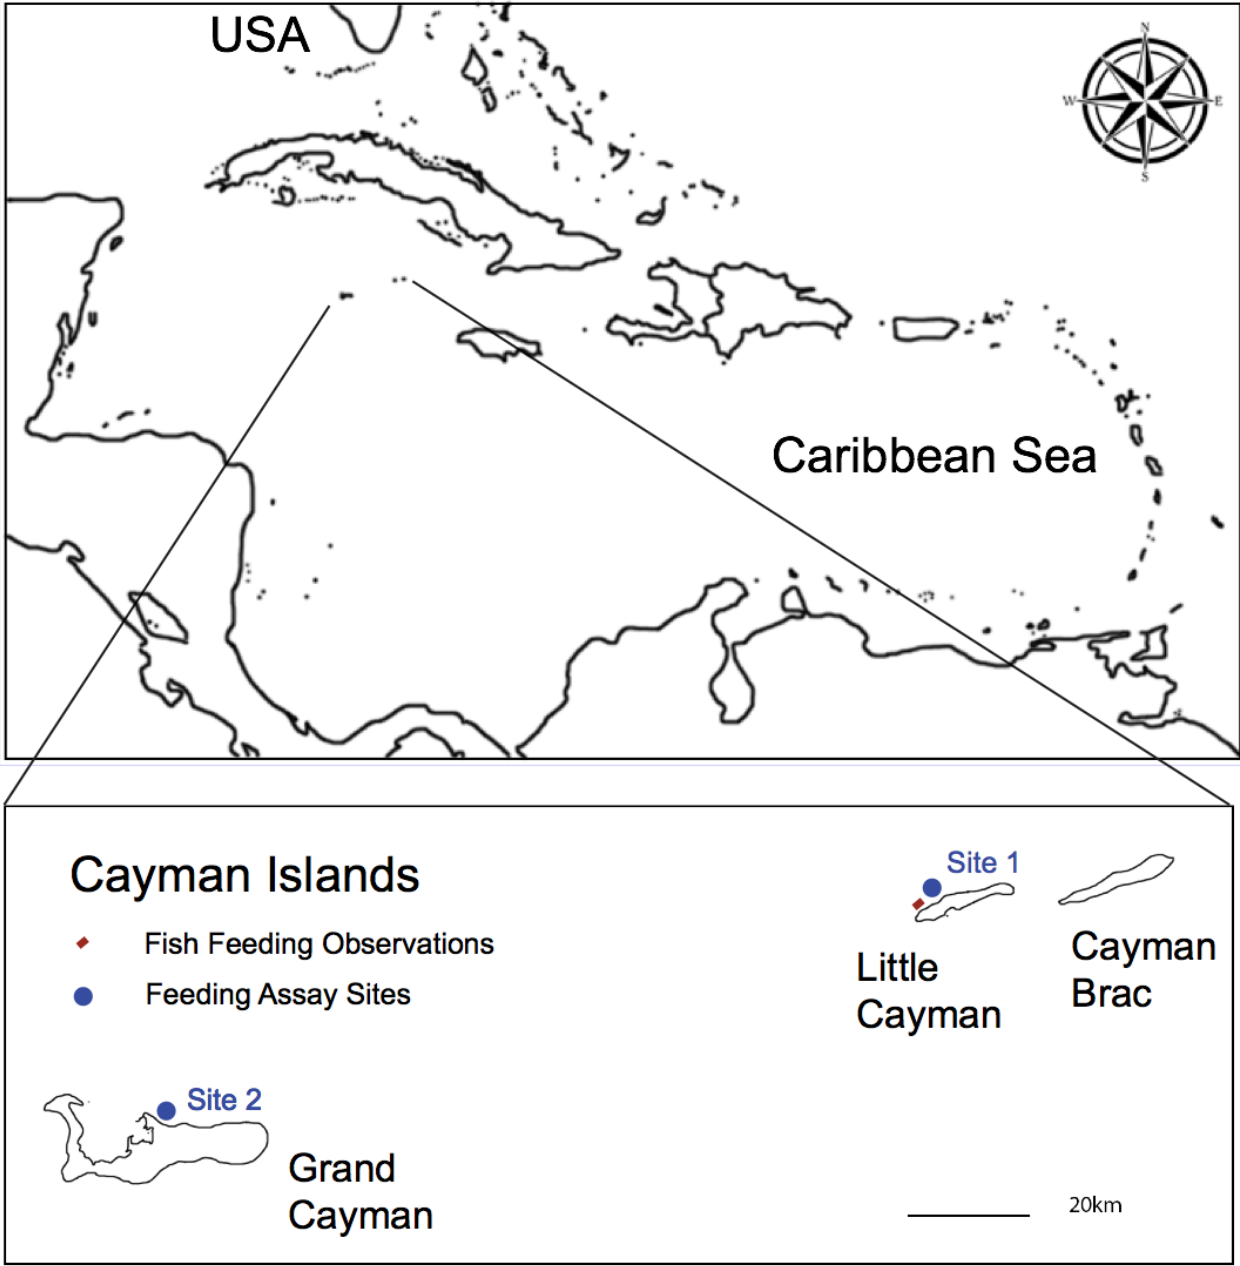

Supplementary Figure 1: Map Showing Location of Cayman Islands and Study Sites.

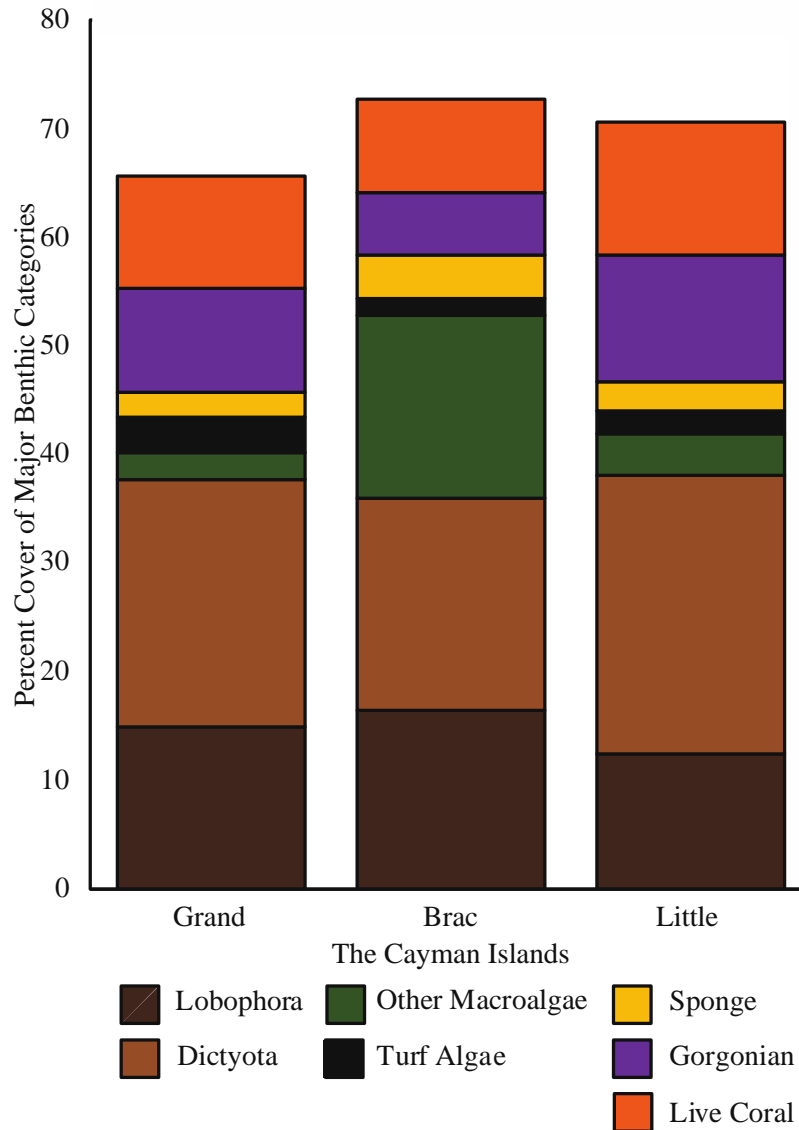

Supplementary Figure 2: Benthic Coverage of Reefs in the Cayman Islands. *Dictyota* and *Lobophora* combined are 38% of the reef.

#### Methods

Ten 30 m transects were surveyed at each of seventeen sites across the three islands. A photograph of the benthos was taken 0.5 m above the substrate every three metres giving 10 photos per transect and 1667 photos in total. These were analysed in CoralNet with 50 points per frame.

O. Beijbom, P.J. Edmunds, D.I. Kline, G.B. Mitchell, D. Kriegman. "Automated Annotation of Coral Reef Survey Images". IEEE Conference on Computer Vision and Pattern Recognition (CVPR), Providence, Rhode Island, June, 2012.

O. Beijbom, P. J. Edmunds, C. Roelfsema, J. Smith, D. I. Kline, B. Neal, M. J. Dunlap, V. Moriarty, T-Y. Fan, C-J. Tan, S. Chan, T. Treibitz, A. Gamst, B. G. Mitchell, D. Kriegman. *"Towards automated annotation of benthic survey images: variability of human experts and operational modes of automation"*. PLOS One, July 2015.

I. D. Williams, C. S. Couch, O. Beijbom, T. A. Oliver, B. Vargas-Angel, B. D. Schumacher, R. E. Brainard. *"Leveraging Automated Image Analysis Tools to Transform Our Capacity to Assess Status and Trends of Coral Reefs"*. Frontiers in Marine Science, May 2019.

O. Beijbom, *"Automated Annotation of Coral Reef Survey Images"*. PhD Thesis UCSD, June 2015.
